# Supplementary material
Source: HighWire-hosted journal article supplement (https://jnm.snmjournals.org/highwire/filestream/94475/field_highwire_adjunct_files/0/115436_Supplemental_Data.pdf)
Supplement: 115436_Supplemental_Data.pdf [file 115436_Supplemental_Data.pdf]

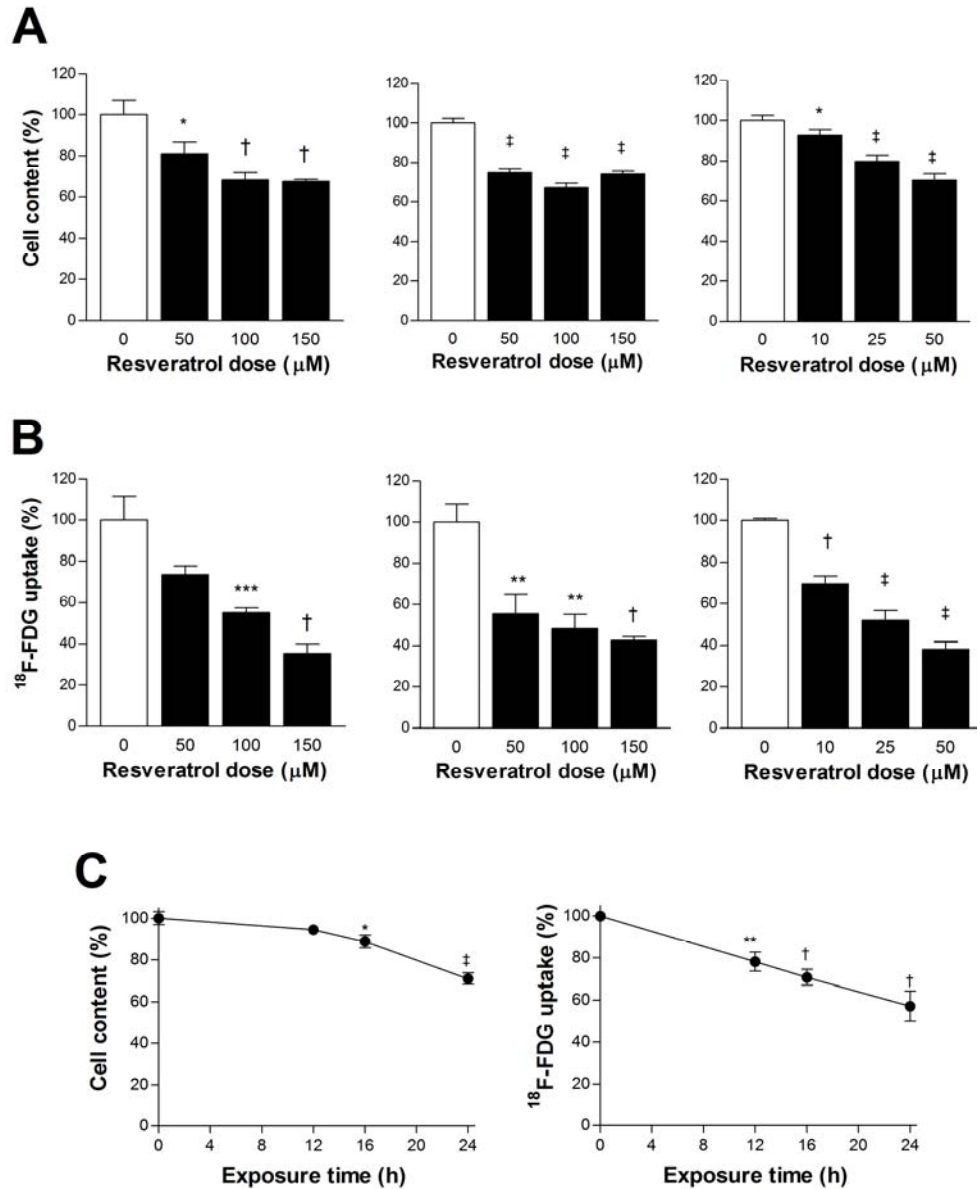

**Supplemental Figure 1.** RSV inhibits cancer cell glucose uptake in a manner surpassing decrease of relative cell content. (A,B) Effects of 24 h treatment with graded doses of RSV on cell content (A) and  $^{18}\text{F}$ -FDG uptake normalized to cell content (B). Cells are T47D (left), CT26 (middle), and LLC cells (right). (C) Time-dependent effects of treatment with 50  $\mu\text{M}$  RSV for up to 24 h on LLC cell content (left) and  $^{18}\text{F}$ -FDG uptake normalized to cell content (right). Bars are mean  $\pm$  SD of triplicate samples expressed as % relative to vehicle treated controls. \*,  $p < 0.05$ ; \*\*,  $p < 0.01$ ; \*\*\*,  $p < 0.001$ ; †,  $p < 0.0005$ ; ‡,  $p < 0.0001$  compared to controls.
